# Supplementary material
Source: Research Square preprint supplement (doi:10.21203/rs.3.rs-9286377/v1)
Supplement: Supplementary file 1 [file df423fa327069bbe3669f77a.xlsx]

## Sheet: Sheet1
control variable					total score	mean	AI anxiety						total score	mean	organizational identification						total score	mean	job insecurity					total score	mean	job crafting					total score	mean	proactive change behavior										total score	mean	withdrawal behavior
2	2	4	3	1	12	2.4	2	2	1	2	2	2	11	1.83333	3	1	2	4	2	2	14	2.33333	2	1	2	2	1	8	1.6	5	4	4	4	5	22	4.4	4	4	5	4	4	4	5	4	3	5	42	4.2	1
2	2	3	3	2	12	2.4	2	1	1	2	1	2	9	1.5	4	2	5	4	5	4	24	4	3	2	1	1	2	9	1.8	4	5	4	4	5	22	4.4	5	4	4	5	4	4	5	4	4	5	44	4.4	1
1	2	3	3	2	11	2.2	2	1	1	4	2	2	12	2	4	1	2	5	4	3	19	3.16667	2	2	1	3	1	9	1.8	1	3	5	4	4	17	3.4	5	3	5	5	4	5	5	5	3	4	44	4.4	2
2	2	4	1	4	13	2.6	3	2	3	2	2	3	15	2.5	4	4	4	4	5	3	24	4	3	3	2	2	2	12	2.4	4	4	4	3	4	19	3.8	4	4	3	3	3	4	4	4	4	4	37	3.7	1
2	2	4	3	1	12	2.4	2	1	2	1	1	1	8	1.33333	5	4	5	5	4	4	27	4.5	1	2	2	1	1	7	1.4	5	5	5	4	4	23	4.6	5	5	4	5	4	4	5	5	5	4	46	4.6	1
1	2	4	4	2	13	2.6	4	5	4	5	2	2	22	3.66667	4	3	4	5	4	5	25	4.16667	4	5	4	4	3	20	4	5	4	5	5	4	23	4.6	5	5	5	4	4	5	4	5	5	4	46	4.6	3
2	1	4	1	3	11	2.2	4	4	5	3	4	4	24	4	5	4	4	5	3	4	25	4.16667	2	1	3	1	2	9	1.8	4	5	3	4	3	19	3.8	5	4	5	4	3	3	5	4	3	5	41	4.1	2
2	2	3	3	5	15	3	2	2	1	2	2	2	11	1.83333	4	4	5	4	5	5	27	4.5	1	2	2	1	1	7	1.4	4	5	4	5	4	22	4.4	5	5	4	5	4	4	5	5	4	5	46	4.6	1
2	2	3	2	1	10	2	1	2	2	1	2	2	10	1.66667	5	3	4	4	5	4	25	4.16667	2	3	2	1	2	10	2	4	5	4	5	5	23	4.6	4	5	4	4	5	4	5	5	4	4	44	4.4	1
2	2	3	2	6	15	3	2	1	3	2	2	2	12	2	2	4	2	4	3	4	19	3.16667	2	3	3	1	2	11	2.2	4	5	5	4	5	23	4.6	4	5	4	5	4	5	4	4	5	4	44	4.4	1
2	2	4	3	6	17	3.4	2	1	2	2	1	1	9	1.5	5	4	4	5	4	5	27	4.5	2	2	1	2	1	8	1.6	4	5	4	5	5	23	4.6	4	5	4	4	5	4	5	4	4	5	44	4.4	2
1	3	4	4	3	15	3	2	1	2	1	1	1	8	1.33333	5	4	5	4	5	5	28	4.66667	1	1	2	1	1	6	1.2	2	4	4	5	4	19	3.8	5	4	4	5	5	4	5	4	5	5	46	4.6	1
2	2	4	3	1	12	2.4	2	2	1	1	2	1	9	1.5	5	5	4	4	5	4	27	4.5	1	2	1	2	2	8	1.6	5	5	4	5	4	23	4.6	5	4	4	5	4	5	5	4	5	4	45	4.5	1
2	2	4	3	3	14	2.8	1	2	1	2	2	1	9	1.5	4	5	4	5	4	4	26	4.33333	2	1	1	2	1	7	1.4	5	5	4	4	5	23	4.6	4	5	4	5	5	4	4	5	4	4	44	4.4	2
1	2	4	2	1	10	2	1	1	2	2	1	1	8	1.33333	4	4	5	5	4	5	27	4.5	1	2	2	1	2	8	1.6	4	4	5	5	4	22	4.4	5	4	5	4	4	5	5	4	5	5	46	4.6	1
2	2	4	3	6	17	3.4	1	1	1	2	1	2	8	1.33333	5	4	4	5	4	5	27	4.5	2	2	1	1	2	8	1.6	5	4	4	5	4	22	4.4	5	5	4	5	4	4	5	5	4	5	46	4.6	2
2	2	4	3	6	17	3.4	1	2	2	1	2	1	9	1.5	4	5	5	4	5	4	27	4.5	1	1	2	2	1	7	1.4	4	5	5	4	5	23	4.6	4	4	5	4	5	5	4	4	5	4	44	4.4	1
2	2	2	4	6	16	3.2	1	2	3	2	1	1	10	1.66667	3	2	3	4	3	2	17	2.83333	1	2	2	1	1	7	1.4	4	4	4	3	3	18	3.6	5	5	3	4	3	4	3	2	3	4	36	3.6	1
2	1	4	1	3	11	2.2	5	4	5	5	4	4	27	4.5	4	4	5	5	4	5	27	4.5	5	4	4	5	4	22	4.4	5	5	5	4	5	24	4.8	5	5	3	4	3	3	3	4	4	5	39	3.9	2
2	2	3	3	2	12	2.4	4	4	5	4	4	3	24	4	4	4	4	5	4	5	26	4.33333	1	1	1	1	1	5	1	4	4	5	5	4	22	4.4	5	5	4	4	4	5	4	4	4	4	43	4.3	1
2	1	3	2	6	14	2.8	1	3	1	1	1	1	8	1.33333	5	5	5	5	5	4	29	4.83333	1	2	1	1	2	7	1.4	4	5	5	4	5	23	4.6	4	5	5	3	4	4	5	4	3	4	41	4.1	1
2	1	4	2	1	10	2	2	1	1	2	4	2	12	2	5	3	4	5	4	3	24	4	2	3	2	2	1	10	2	4	5	5	4	5	23	4.6	4	4	2	3	3	2	3	4	3	5	33	3.3	1
2	2	4	4	1	13	2.6	2	2	1	2	1	3	11	1.83333	4	2	4	5	4	4	23	3.83333	2	2	1	1	1	7	1.4	4	4	4	5	4	21	4.2	5	5	5	4	4	5	4	4	4	5	45	4.5	2
2	2	4	3	1	12	2.4	2	2	3	2	1	2	12	2	5	3	4	5	4	4	25	4.16667	2	1	2	2	2	9	1.8	4	4	4	5	3	20	4	4	5	5	5	4	4	3	4	4	4	42	4.2	1
2	1	3	1	2	9	1.8	4	5	4	4	4	4	25	4.16667	5	4	4	4	5	4	26	4.33333	4	5	4	4	4	21	4.2	5	4	4	5	4	22	4.4	4	4	5	4	4	4	4	5	4	4	42	4.2	2
2	2	1	2	4	11	2.2	4	4	3	5	4	4	24	4	5	3	2	4	3	4	21	3.5	4	4	3	3	3	17	3.4	4	5	5	3	4	21	4.2	3	4	2	4	3	3	4	5	3	3	34	3.4	2
2	1	3	1	3	10	2	3	2	4	2	2	2	15	2.5	4	4	3	4	3	4	22	3.66667	4	5	5	4	3	21	4.2	4	4	5	4	5	22	4.4	4	4	3	2	4	3	4	3	4	4	35	3.5	4
2	2	3	3	1	11	2.2	1	2	2	1	1	2	9	1.5	4	5	4	4	5	4	26	4.33333	1	2	1	1	1	6	1.2	4	5	4	4	5	22	4.4	5	4	4	5	4	4	4	5	5	4	44	4.4	1
1	2	3	3	3	12	2.4	5	4	4	5	4	5	27	4.5	2	2	1	2	1	2	10	1.66667	5	4	4	5	4	22	4.4	4	4	5	4	5	22	4.4	5	4	5	4	4	5	3	5	5	4	44	4.4	4
2	2	3	3	1	11	2.2	2	1	1	2	1	2	9	1.5	4	5	4	5	5	4	27	4.5	1	2	1	1	1	6	1.2	4	4	5	5	4	22	4.4	4	5	5	4	4	5	5	4	4	5	45	4.5	1
2	2	3	3	1	11	2.2	2	1	1	2	2	2	10	1.66667	4	5	4	4	5	1	23	3.83333	1	2	1	1	1	6	1.2	4	5	5	4	4	22	4.4	5	5	4	4	4	5	5	4	4	5	45	4.5	1
2	2	3	3	3	13	2.6	3	2	3	4	2	2	16	2.66667	4	3	5	5	3	5	25	4.16667	5	4	3	3	2	17	3.4	4	4	5	4	5	22	4.4	5	4	4	5	3	3	4	4	3	4	39	3.9	1
2	2	3	2	3	12	2.4	3	4	3	2	2	2	16	2.66667	3	4	3	4	3	3	20	3.33333	3	3	2	3	2	13	2.6	3	4	3	3	5	18	3.6	3	4	4	3	3	3	4	4	4	3	35	3.5	3
2	2	3	3	1	11	2.2	2	1	1	2	2	2	10	1.66667	4	5	4	5	4	4	26	4.33333	1	2	1	1	1	6	1.2	4	5	4	4	5	22	4.4	5	4	4	5	4	4	5	5	4	5	45	4.5	1
2	2	3	3	1	11	2.2	2	1	1	2	1	2	9	1.5	4	5	4	5	5	4	27	4.5	1	2	1	1	1	6	1.2	4	5	5	4	5	23	4.6	5	4	4	5	4	4	5	4	4	5	44	4.4	1
2	2	3	3	6	16	3.2	3	2	3	3	4	3	18	3	4	2	4	5	3	4	22	3.66667	3	2	2	3	1	11	2.2	4	4	5	3	3	19	3.8	4	4	3	4	2	3	1	2	4	4	31	3.1	1
2	2	3	3	1	11	2.2	1	2	2	1	1	2	9	1.5	4	5	4	4	5	4	26	4.33333	1	2	1	1	1	6	1.2	4	5	5	4	4	22	4.4	5	5	4	4	4	5	5	4	4	5	45	4.5	1
2	2	4	3	2	13	2.6	5	4	5	4	5	5	28	4.66667	1	4	2	1	2	1	11	1.83333	4	5	4	5	5	23	4.6	2	1	2	1	1	7	1.4	2	1	2	1	2	2	1	2	1	2	16	1.6	5
2	2	4	2	2	12	2.4	2	1	2	2	1	2	10	1.66667	4	4	5	4	5	5	27	4.5	2	1	2	2	1	8	1.6	4	5	4	4	5	22	4.4	4	5	4	4	5	4	5	5	4	5	45	4.5	2
1	2	4	2	1	10	2	3	2	3	4	4	4	20	3.33333	5	4	4	5	3	3	24	4	2	3	4	2	1	12	2.4	4	5	5	4	4	22	4.4	5	4	5	4	4	3	5	4	5	4	43	4.3	2
2	2	3	3	1	11	2.2	2	1	2	1	1	2	9	1.5	4	4	5	5	4	5	27	4.5	2	2	1	2	1	8	1.6	5	5	4	4	5	23	4.6	5	4	5	5	4	5	4	5	5	4	46	4.6	1
2	2	3	3	1	11	2.2	2	1	1	2	2	2	10	1.66667	4	5	4	5	5	4	27	4.5	1	2	1	1	1	6	1.2	4	5	5	4	4	22	4.4	5	5	4	4	5	5	4	4	5	4	45	4.5	1
2	2	3	3	1	11	2.2	2	1	1	2	2	2	10	1.66667	4	4	4	5	5	4	26	4.33333	1	2	1	1	1	6	1.2	4	5	4	4	5	22	4.4	4	4	5	4	4	5	5	4	4	5	44	4.4	1
2	2	4	2	2	12	2.4	2	1	1	2	1	2	9	1.5	4	4	5	5	4	5	27	4.5	2	1	2	2	1	8	1.6	4	5	4	4	5	22	4.4	4	5	4	4	5	4	4	5	4	5	44	4.4	2
2	1	3	1	3	10	2	4	2	5	2	2	2	17	2.83333	4	3	4	4	4	5	24	4	4	5	4	4	4	21	4.2	5	4	4	4	5	22	4.4	5	4	4	5	4	3	4	4	5	4	42	4.2	2
2	2	3	3	3	13	2.6	2	2	3	2	3	2	14	2.33333	3	2	1	3	4	3	16	2.66667	2	3	3	2	2	12	2.4	3	4	4	3	4	18	3.6	4	5	4	4	5	4	4	5	4	5	44	4.4	2
1	2	3	3	2	11	2.2	2	1	2	1	1	2	9	1.5	3	2	4	4	4	5	22	3.66667	2	1	2	1	2	8	1.6	4	5	4	3	5	21	4.2	4	4	4	5	4	3	4	4	4	5	41	4.1	1
2	2	3	3	1	11	2.2	2	2	1	1	2	2	10	1.66667	4	5	4	4	5	4	26	4.33333	1	2	2	1	1	7	1.4	4	5	4	4	5	22	4.4	5	4	4	5	4	4	5	4	4	5	44	4.4	1
2	2	3	2	2	11	2.2	2	1	1	2	1	2	9	1.5	4	4	5	4	5	4	26	4.33333	2	1	2	2	1	8	1.6	4	5	4	4	5	22	4.4	4	4	5	4	5	4	4	5	4	4	43	4.3	2
2	2	4	3	2	13	2.6	5	4	5	5	4	5	28	4.66667	1	4	2	1	2	1	11	1.83333	5	4	5	5	4	23	4.6	2	1	2	1	1	7	1.4	2	1	2	1	2	2	1	2	1	2	16	1.6	5
2	2	4	3	2	13	2.6	4	5	5	4	5	5	28	4.66667	1	4	2	1	2	1	11	1.83333	5	4	5	5	4	23	4.6	2	1	2	2	1	8	1.6	2	1	1	2	1	2	1	2	2	1	15	1.5	5
2	2	4	3	2	13	2.6	4	5	5	4	5	5	28	4.66667	1	4	2	1	2	1	11	1.83333	5	4	5	5	4	23	4.6	2	1	2	2	1	8	1.6	2	1	2	1	1	2	1	2	1	2	15	1.5	5
2	2	4	3	2	13	2.6	5	4	5	5	4	5	28	4.66667	1	4	2	1	2	1	11	1.83333	5	4	5	5	4	23	4.6	2	1	2	2	1	8	1.6	2	1	2	1	1	2	1	2	2	1	15	1.5	5
2	2	4	3	2	13	2.6	5	4	5	4	5	5	28	4.66667	1	4	2	1	2	2	12	2	5	4	5	5	4	23	4.6	2	1	2	1	1	7	1.4	2	1	2	1	2	1	2	1	1	2	15	1.5	5
2	2	4	3	2	13	2.6	5	4	5	4	5	5	28	4.66667	1	5	2	1	2	1	12	2	4	5	4	5	5	23	4.6	2	1	2	2	1	8	1.6	2	1	2	1	2	2	1	2	1	2	16	1.6	4
2	2	2	3	3	12	2.4	4	4	5	2	4	4	23	3.83333	3	2	3	4	3	4	19	3.16667	4	4	4	5	4	21	4.2	5	4	4	4	5	22	4.4	5	5	4	4	4	4	5	4	5	4	44	4.4	2
2	2	3	1	2	10	2	5	4	5	4	4	3	25	4.16667	4	5	4	4	4	5	26	4.33333	5	5	4	4	4	22	4.4	4	4	5	3	3	19	3.8	4	3	3	3	4	3	4	3	3	4	34	3.4	4
2	2	3	3	4	14	2.8	4	5	5	3	2	4	23	3.83333	5	5	5	5	4	5	29	4.83333	1	2	1	1	1	6	1.2	4	4	5	4	5	22	4.4	5	5	4	4	5	4	4	5	4	4	44	4.4	1
2	2	3	3	3	13	2.6	4	4	5	5	4	4	26	4.33333	5	4	5	5	4	5	28	4.66667	5	5	4	4	5	23	4.6	3	4	5	3	5	20	4	4	5	3	3	3	4	5	4	4	3	38	3.8	1
2	2	3	3	2	12	2.4	2	2	2	1	2	2	11	1.83333	4	4	4	4	5	4	25	4.16667	2	2	1	1	2	8	1.6	4	4	4	5	5	22	4.4	5	4	5	5	4	5	5	4	5	5	47	4.7	2
2	1	4	2	1	10	2	4	4	3	2	3	2	18	3	4	3	3	4	4	4	22	3.66667	3	4	3	5	2	17	3.4	4	4	5	4	5	22	4.4	4	4	2	1	2	2	4	5	3	4	31	3.1	1
1	1	3	2	2	9	1.8	1	2	4	4	4	2	17	2.83333	5	4	4	5	4	5	27	4.5	4	5	4	2	2	17	3.4	4	5	4	2	5	20	4	4	5	2	4	4	5	4	5	5	4	42	4.2	1
2	3	3	4	2	14	2.8	2	1	2	2	3	2	12	2	4	3	4	4	5	3	23	3.83333	2	3	1	2	2	10	2	4	5	4	4	5	22	4.4	4	5	5	4	5	5	4	4	3	5	44	4.4	2
1	2	3	3	1	10	2	2	1	2	1	1	1	8	1.33333	4	2	4	5	4	5	24	4	2	1	1	2	1	7	1.4	5	4	5	4	4	22	4.4	5	5	4	5	4	5	5	4	5	5	47	4.7	1
1	2	3	3	1	10	2	2	2	4	3	4	4	19	3.16667	5	3	4	4	5	4	25	4.16667	2	2	1	3	1	9	1.8	4	4	5	4	4	21	4.2	5	4	4	4	5	4	4	3	4	4	41	4.1	2
1	2	3	3	1	10	2	2	1	3	1	1	1	9	1.5	4	4	4	5	4	4	25	4.16667	2	2	1	2	2	9	1.8	4	4	5	4	5	22	4.4	3	4	2	2	1	1	3	1	3	5	25	2.5	2
2	3	4	3	3	15	3	2	1	2	1	1	2	9	1.5	5	4	4	5	5	4	27	4.5	2	2	1	2	2	9	1.8	5	5	5	4	5	24	4.8	4	5	4	5	4	4	4	4	5	5	44	4.4	1
2	2	3	3	2	12	2.4	3	2	3	2	3	2	15	2.5	5	4	5	5	4	4	27	4.5	4	3	3	2	1	13	2.6	4	5	4	4	5	22	4.4	4	5	3	4	3	4	5	3	4	4	39	3.9	1
2	2	3	4	6	17	3.4	3	2	3	2	3	4	17	2.83333	3	2	3	4	3	4	19	3.16667	3	4	4	2	5	18	3.6	3	4	3	4	3	17	3.4	3	3	2	1	2	1	3	2	2	4	23	2.3	2
1	4	3	5	2	15	3	2	2	1	2	1	3	11	1.83333	5	4	5	4	5	4	27	4.5	2	1	2	1	1	7	1.4	3	4	5	4	4	20	4	5	4	4	5	4	5	5	4	5	4	45	4.5	1
2	3	3	3	2	13	2.6	4	3	4	3	4	4	22	3.66667	3	4	3	4	3	4	21	3.5	3	4	4	3	3	17	3.4	4	4	5	3	4	20	4	4	5	4	4	5	4	4	3	4	4	41	4.1	2
1	2	3	2	3	11	2.2	4	4	5	3	3	4	23	3.83333	4	5	5	4	4	5	27	4.5	3	4	4	3	4	18	3.6	5	5	4	3	4	21	4.2	4	5	5	5	3	4	4	5	4	5	44	4.4	2
1	2	3	4	3	13	2.6	4	5	4	3	2	3	21	3.5	4	4	5	5	4	5	27	4.5	4	4	5	3	3	19	3.8	4	5	4	4	5	22	4.4	5	4	4	4	5	4	5	4	3	5	43	4.3	2
2	1	1	3	1	8	1.6	4	5	4	4	5	5	27	4.5	4	4	5	4	5	5	27	4.5	5	4	4	5	4	22	4.4	5	4	5	5	4	23	4.6	5	4	4	5	5	5	4	5	5	4	46	4.6	2
1	2	3	2	1	9	1.8	1	2	1	1	2	2	9	1.5	5	4	4	5	4	5	27	4.5	3	2	3	2	2	12	2.4	5	4	5	4	4	22	4.4	5	4	5	5	4	5	5	4	5	5	47	4.7	1
2	2	3	2	3	12	2.4	4	5	5	4	2	2	22	3.66667	4	5	4	4	5	4	26	4.33333	4	4	5	4	4	21	4.2	5	4	5	4	5	23	4.6	5	4	4	5	5	4	5	4	4	5	45	4.5	2
1	3	1	5	6	16	3.2	4	2	4	4	4	4	22	3.66667	4	5	4	4	4	5	26	4.33333	4	5	4	5	5	23	4.6	4	4	5	4	5	22	4.4	4	5	4	5	4	5	4	4	5	5	45	4.5	1
2	2	3	3	1	11	2.2	2	1	2	3	2	2	12	2	4	3	2	3	2	4	18	3	2	1	2	2	1	8	1.6	4	4	5	4	3	20	4	4	5	4	4	4	4	3	4	5	5	42	4.2	1
2	2	4	3	1	12	2.4	1	2	2	1	2	2	10	1.66667	4	1	4	5	3	4	21	3.5	2	2	3	1	2	10	2	5	4	4	4	5	22	4.4	5	4	4	5	4	5	5	4	4	5	45	4.5	2
2	2	4	3	1	12	2.4	1	1	2	1	2	1	8	1.33333	5	3	4	4	5	4	25	4.16667	1	1	2	1	2	7	1.4	4	5	4	4	5	22	4.4	4	5	5	4	5	4	5	4	4	5	45	4.5	1
2	3	4	3	1	13	2.6	1	2	1	1	2	1	8	1.33333	4	3	5	4	4	5	25	4.16667	1	2	1	1	2	7	1.4	4	5	5	4	5	23	4.6	4	4	5	4	5	4	5	5	4	5	45	4.5	1
2	2	4	3	1	12	2.4	2	1	1	2	1	2	9	1.5	5	3	4	5	5	4	26	4.33333	2	1	1	2	1	7	1.4	5	5	4	5	4	23	4.6	4	5	4	5	4	5	5	4	5	4	45	4.5	2
2	2	1	3	3	11	2.2	4	3	4	2	2	2	17	2.83333	4	4	4	5	4	4	25	4.16667	3	2	3	3	2	13	2.6	4	4	4	4	4	20	4	4	4	4	4	4	4	5	4	5	5	43	4.3	3
2	1	4	1	2	10	2	4	4	4	1	1	2	16	2.66667	5	5	4	5	4	4	27	4.5	4	4	4	4	5	21	4.2	4	4	2	2	4	16	3.2	4	4	4	4	4	4	5	4	4	4	41	4.1	2
1	2	3	3	1	10	2	1	2	2	1	2	2	10	1.66667	5	3	4	4	5	4	25	4.16667	1	2	2	1	2	8	1.6	4	5	4	4	5	22	4.4	4	5	5	4	5	4	5	4	4	5	45	4.5	2
2	3	4	4	2	15	3	3	2	3	2	2	4	16	2.66667	5	2	4	5	5	4	25	4.16667	3	2	3	1	2	11	2.2	5	4	4	3	5	21	4.2	3	5	3	4	5	4	5	5	4	5	43	4.3	2
1	1	2	2	1	7	1.4	3	2	3	1	2	2	13	2.16667	3	4	2	3	2	4	18	3	2	2	3	1	2	10	2	4	4	5	2	4	19	3.8	3	4	3	3	3	4	4	2	3	4	33	3.3	2
2	3	3	3	2	13	2.6	2	1	2	2	1	2	10	1.66667	5	1	4	4	5	4	23	3.83333	2	1	1	2	2	8	1.6	4	4	5	4	4	21	4.2	5	5	4	4	5	5	4	4	5	5	46	4.6	2
2	2	3	3	2	12	2.4	2	1	2	2	1	2	10	1.66667	4	3	4	5	4	4	24	4	2	1	2	1	1	7	1.4	4	4	5	4	4	21	4.2	5	5	4	4	5	5	5	4	4	5	46	4.6	1
1	1	3	2	1	8	1.6	3	2	5	2	2	3	17	2.83333	5	2	3	4	4	4	22	3.66667	3	2	2	2	1	10	2	5	4	3	3	5	20	4	5	5	2	3	3	3	5	4	3	2	35	3.5	1
2	3	3	5	2	15	3	3	1	3	2	2	3	14	2.33333	4	3	4	5	4	4	24	4	4	5	3	4	3	19	3.8	4	5	4	3	5	21	4.2	4	4	3	5	4	4	5	3	3	4	39	3.9	1
1	2	3	4	3	13	2.6	2	2	2	4	4	4	18	3	4	4	4	4	4	4	24	4	5	5	3	2	1	16	3.2	4	4	4	4	3	19	3.8	4	4	4	4	4	5	4	4	4	3	40	4	2
2	2	3	4	4	15	3	5	4	5	5	3	2	24	4	4	5	5	4	4	5	27	4.5	4	5	4	4	5	22	4.4	4	5	4	5	4	22	4.4	4	5	5	4	5	4	4	5	5	4	45	4.5	2
1	2	3	2	6	14	2.8	2	1	1	2	1	2	9	1.5	4	3	4	5	4	3	23	3.83333	2	3	2	1	1	9	1.8	4	5	5	4	4	22	4.4	5	4	4	5	4	5	4	5	4	5	45	4.5	2
2	2	3	3	2	12	2.4	2	3	3	4	3	3	18	3	4	2	3	4	4	3	20	3.33333	2	3	3	3	1	12	2.4	4	3	4	4	5	20	4	4	4	3	3	4	4	4	4	5	4	39	3.9	1
1	2	3	4	1	11	2.2	1	1	1	2	1	1	7	1.16667	5	5	4	5	5	4	28	4.66667	1	2	1	1	1	6	1.2	5	5	5	4	4	23	4.6	5	5	5	5	4	5	5	4	5	5	48	4.8	1
2	2	3	2	2	11	2.2	4	5	4	3	2	2	20	3.33333	5	4	5	4	4	5	27	4.5	4	5	4	3	4	20	4	4	5	4	5	4	22	4.4	4	5	3	4	2	4	4	4	4	5	39	3.9	2
1	2	3	2	3	11	2.2	2	3	2	2	3	2	14	2.33333	4	3	4	4	5	3	23	3.83333	3	2	2	3	2	12	2.4	4	5	3	3	4	19	3.8	5	5	3	4	3	5	4	3	3	4	39	3.9	2
1	2	3	3	4	13	2.6	2	4	1	5	4	4	20	3.33333	2	4	2	5	4	5	22	3.66667	4	5	2	4	2	17	3.4	5	4	5	4	5	23	4.6	5	4	2	1	5	4	5	4	5	4	39	3.9	2
2	2	3	3	1	11	2.2	1	2	3	3	2	2	13	2.16667	3	4	4	5	3	4	23	3.83333	4	5	4	4	3	20	4	5	4	5	4	4	22	4.4	5	4	5	4	5	4	5	4	5	4	45	4.5	2
2	3	2	3	4	14	2.8	4	5	4	2	3	2	20	3.33333	4	4	5	4	4	5	26	4.33333	4	5	4	5	5	23	4.6	4	4	5	5	4	22	4.4	4	5	5	4	4	5	4	3	5	4	43	4.3	1
2	2	3	3	1	11	2.2	1	2	1	2	2	2	10	1.66667	5	4	4	5	4	4	26	4.33333	1	2	2	1	1	7	1.4	5	4	5	4	4	22	4.4	5	4	4	5	4	4	5	4	4	5	44	4.4	1
2	2	3	3	1	11	2.2	1	2	1	2	2	2	10	1.66667	5	4	4	5	4	4	26	4.33333	1	2	2	1	1	7	1.4	5	4	5	4	4	22	4.4	5	4	4	5	4	4	5	4	4	5	44	4.4	1
1	2	3	3	2	11	2.2	3	2	3	3	2	3	16	2.66667	4	3	3	4	4	3	21	3.5	3	3	2	2	3	13	2.6	4	4	5	4	4	21	4.2	4	3	4	5	4	5	4	3	4	4	40	4	2
2	2	3	3	2	12	2.4	3	3	4	2	3	2	17	2.83333	4	2	4	4	3	4	21	3.5	4	5	4	4	3	20	4	4	5	4	4	5	22	4.4	4	5	4	5	5	4	5	4	4	5	45	4.5	2
1	3	3	4	1	12	2.4	2	1	2	1	1	1	8	1.33333	4	3	3	5	5	4	24	4	1	1	2	2	1	7	1.4	5	4	4	5	4	22	4.4	5	5	5	4	4	5	3	3	4	5	43	4.3	2
2	3	3	5	2	15	3	3	2	3	3	2	3	16	2.66667	4	4	4	5	4	4	25	4.16667	3	3	2	2	2	12	2.4	4	4	5	4	4	21	4.2	3	4	4	4	3	4	4	4	3	4	37	3.7	1
2	2	3	4	3	14	2.8	4	3	5	4	4	4	24	4	5	2	4	5	4	5	25	4.16667	2	3	2	3	1	11	2.2	4	4	4	3	4	19	3.8	2	4	4	3	2	2	5	4	4	4	34	3.4	1
2	1	3	2	1	9	1.8	2	4	5	3	4	4	22	3.66667	2	4	2	5	1	4	18	3	2	4	2	1	1	10	2	5	5	3	2	5	20	4	4	4	1	2	3	2	4	4	2	4	30	3	1
2	3	3	4	2	14	2.8	1	2	2	1	2	2	10	1.66667	4	5	4	4	5	4	26	4.33333	1	2	1	2	1	7	1.4	4	4	5	4	3	20	4	4	5	4	4	4	5	4	4	5	4	43	4.3	1
1	3	3	4	6	17	3.4	4	3	5	3	2	3	20	3.33333	5	5	4	3	3	4	24	4	5	5	4	3	4	21	4.2	4	5	4	3	5	21	4.2	4	5	2	4	3	3	4	5	4	4	38	3.8	2
2	2	3	3	2	12	2.4	4	5	5	4	4	4	26	4.33333	4	5	4	5	4	4	26	4.33333	4	5	5	4	5	23	4.6	4	5	3	5	3	20	4	5	5	4	5	5	4	5	5	5	4	47	4.7	1
2	1	3	2	3	11	2.2	4	2	4	3	1	2	16	2.66667	4	4	5	5	4	5	27	4.5	4	4	5	4	2	19	3.8	4	5	5	2	4	20	4	5	4	2	2	4	1	4	5	2	4	33	3.3	2
2	1	2	1	1	7	1.4	4	4	4	3	4	4	23	3.83333	4	3	4	4	4	4	23	3.83333	4	4	5	4	4	21	4.2	5	5	4	3	5	22	4.4	4	4	3	4	4	4	4	4	3	4	38	3.8	3
2	3	3	4	2	14	2.8	4	3	5	4	3	4	23	3.83333	4	3	4	4	4	5	24	4	4	5	4	4	4	21	4.2	4	5	4	5	4	22	4.4	5	4	4	5	4	4	4	4	4	4	42	4.2	2
2	2	3	3	2	12	2.4	2	1	3	3	2	2	13	2.16667	4	3	4	5	4	3	23	3.83333	4	3	3	4	4	18	3.6	5	4	5	5	4	23	4.6	4	5	4	4	5	4	5	5	4	4	44	4.4	1
1	5	3	5	2	16	3.2	2	1	4	3	2	2	14	2.33333	5	4	5	5	5	5	29	4.83333	2	2	1	1	1	7	1.4	3	4	4	5	4	20	4	4	5	3	4	3	4	4	5	5	4	41	4.1	2
2	2	4	2	2	12	2.4	3	3	2	1	2	2	13	2.16667	4	4	4	5	5	4	26	4.33333	2	3	2	2	1	10	2	4	4	5	3	4	20	4	5	4	4	5	4	4	5	4	4	5	44	4.4	1
2	2	3	2	2	11	2.2	2	1	3	2	1	2	11	1.83333	1	3	2	4	3	2	15	2.5	1	2	1	2	1	7	1.4	4	5	3	4	2	18	3.6	4	5	2	4	5	4	3	4	5	4	40	4	1
2	2	2	3	4	13	2.6	4	5	5	4	2	2	22	3.66667	4	2	4	5	4	4	23	3.83333	2	2	1	1	1	7	1.4	4	5	4	4	5	22	4.4	4	4	4	5	5	4	5	5	4	5	45	4.5	1
1	2	3	3	6	15	3	2	1	2	2	1	1	9	1.5	4	3	4	5	4	4	24	4	1	2	2	1	1	7	1.4	4	5	5	4	5	23	4.6	4	5	5	4	4	5	4	4	5	4	44	4.4	1
2	2	3	3	2	12	2.4	4	4	5	3	4	3	23	3.83333	4	4	5	4	5	4	26	4.33333	4	5	4	4	3	20	4	4	5	5	4	5	23	4.6	4	5	4	5	5	4	5	4	4	5	45	4.5	3
1	2	2	3	6	14	2.8	1	2	1	1	1	1	7	1.16667	5	5	4	4	5	4	27	4.5	1	2	1	1	2	7	1.4	5	5	4	5	5	24	4.8	4	5	4	5	5	4	5	4	5	5	46	4.6	1
1	3	3	5	2	14	2.8	2	1	1	2	1	3	10	1.66667	5	5	4	5	4	5	28	4.66667	1	2	1	1	2	7	1.4	1	2	1	1	5	10	2	5	4	5	4	5	5	4	5	4	5	46	4.6	1
2	2	1	3	3	11	2.2	4	5	4	4	5	4	26	4.33333	5	4	4	5	4	4	26	4.33333	4	4	5	4	4	21	4.2	5	4	5	3	4	21	4.2	3	4	3	4	3	4	4	2	4	4	35	3.5	2
2	2	3	2	2	11	2.2	1	2	2	1	1	2	9	1.5	5	4	5	5	4	1	24	4	1	2	1	1	1	6	1.2	5	4	5	5	4	23	4.6	5	5	4	5	4	5	5	4	5	5	47	4.7	1
1	2	4	3	1	11	2.2	2	1	2	2	1	2	10	1.66667	4	5	5	4	4	5	27	4.5	2	1	1	2	1	7	1.4	5	4	4	4	5	22	4.4	4	5	4	4	5	5	4	4	5	4	44	4.4	2
2	2	3	3	3	13	2.6	2	4	5	2	3	1	17	2.83333	4	4	5	5	5	4	27	4.5	4	5	5	4	4	22	4.4	5	5	4	2	5	21	4.2	4	5	3	5	4	3	3	4	4	5	40	4	2
1	3	3	4	1	12	2.4	4	5	4	2	2	2	19	3.16667	4	4	3	5	4	4	24	4	5	4	4	5	4	22	4.4	4	5	4	4	5	22	4.4	5	4	3	4	4	5	5	3	4	4	41	4.1	1
2	2	3	2	3	12	2.4	4	2	5	4	2	2	19	3.16667	4	5	5	4	4	5	27	4.5	2	2	1	1	2	8	1.6	5	4	3	1	4	17	3.4	5	4	2	3	5	2	4	5	2	4	36	3.6	2
2	2	3	3	6	16	3.2	1	2	3	2	2	2	12	2	4	4	5	5	4	5	27	4.5	2	3	3	2	2	12	2.4	5	5	4	4	5	23	4.6	5	5	4	4	5	4	5	4	4	5	45	4.5	1
2	1	3	2	3	11	2.2	2	2	1	5	2	1	13	2.16667	4	5	5	4	5	2	25	4.16667	2	5	1	2	2	12	2.4	5	4	5	2	4	20	4	1	5	2	4	1	2	5	4	4	5	33	3.3	2
2	3	3	2	1	11	2.2	2	2	1	1	2	2	10	1.66667	4	3	4	5	4	4	24	4	2	2	1	2	1	8	1.6	4	4	5	4	4	21	4.2	5	4	2	4	2	4	3	4	4	5	37	3.7	2
1	2	3	4	4	14	2.8	3	2	2	3	4	4	18	3	3	2	3	4	4	4	20	3.33333	4	5	4	4	3	20	4	4	5	4	4	3	20	4	4	3	4	3	4	3	3	4	3	4	35	3.5	4
2	2	4	2	1	11	2.2	2	1	1	2	1	2	9	1.5	5	2	3	5	5	3	23	3.83333	2	1	1	3	1	8	1.6	4	4	5	3	5	21	4.2	4	4	3	5	2	4	3	3	5	4	37	3.7	2
2	3	3	3	2	13	2.6	1	1	2	1	1	1	7	1.16667	5	2	5	5	5	4	26	4.33333	1	1	1	2	1	6	1.2	4	5	5	5	4	23	4.6	5	5	2	2	5	5	4	5	4	5	42	4.2	1
1	3	4	4	2	14	2.8	2	2	4	3	2	4	17	2.83333	5	2	3	5	4	5	24	4	1	3	2	1	1	8	1.6	4	4	5	3	4	20	4	5	4	3	3	2	4	3	2	3	4	33	3.3	3
1	3	2	5	1	12	2.4	2	2	4	4	5	2	19	3.16667	5	4	4	5	4	4	26	4.33333	4	5	4	5	4	22	4.4	4	5	2	4	4	19	3.8	5	5	4	4	5	2	4	5	4	5	43	4.3	1
1	2	2	3	1	9	1.8	2	1	2	1	1	3	10	1.66667	5	4	5	5	4	5	28	4.66667	1	2	1	1	1	6	1.2	5	4	5	5	4	23	4.6	5	4	5	5	4	5	5	4	5	5	47	4.7	1
1	2	3	3	1	10	2	2	1	2	1	1	2	9	1.5	4	4	5	5	5	4	27	4.5	2	3	3	3	2	13	2.6	5	4	5	4	4	22	4.4	5	4	4	3	5	3	5	4	4	5	42	4.2	2
1	4	4	5	1	15	3	1	2	1	1	2	1	8	1.33333	5	2	5	5	4	2	23	3.83333	2	1	1	2	1	7	1.4	4	5	5	4	5	23	4.6	5	4	5	5	4	5	5	5	4	4	46	4.6	1
1	3	2	5	2	13	2.6	1	2	2	1	1	2	9	1.5	5	4	5	5	4	5	28	4.66667	1	2	1	1	2	7	1.4	1	5	4	5	5	20	4	4	5	5	4	4	5	4	5	4	5	45	4.5	1
2	2	3	3	2	12	2.4	3	4	4	5	3	3	22	3.66667	3	4	2	3	3	4	19	3.16667	4	4	3	4	3	18	3.6	4	5	4	3	5	21	4.2	4	4	3	3	2	3	4	4	3	4	34	3.4	2
2	3	3	5	2	15	3	1	2	1	1	2	2	9	1.5	5	5	4	5	4	5	28	4.66667	1	2	1	1	2	7	1.4	5	4	5	5	4	23	4.6	5	5	4	5	5	4	5	5	4	5	47	4.7	1
1	2	4	2	2	11	2.2	1	2	2	3	2	2	12	2	4	3	4	5	3	5	24	4	2	2	2	2	2	10	2	4	4	4	4	5	21	4.2	5	5	3	4	4	4	4	4	4	4	41	4.1	3
2	1	3	2	3	11	2.2	1	2	2	1	1	1	8	1.33333	4	5	4	5	4	4	26	4.33333	1	1	2	2	1	7	1.4	4	5	5	4	4	22	4.4	5	4	5	4	5	4	4	3	4	5	43	4.3	1
2	1	3	2	2	10	2	4	5	5	4	3	3	24	4	4	2	4	5	3	4	22	3.66667	4	5	5	4	5	23	4.6	5	4	4	2	3	18	3.6	2	2	1	1	2	3	2	2	3	2	20	2	1
1	3	3	4	1	12	2.4	2	1	2	1	2	2	10	1.66667	4	5	4	5	4	4	26	4.33333	2	1	2	1	2	8	1.6	4	5	4	4	5	22	4.4	4	5	4	4	3	4	5	4	4	5	42	4.2	1
1	2	3	2	1	9	1.8	2	3	2	2	3	2	14	2.33333	4	5	4	4	3	4	24	4	2	3	2	1	2	10	2	4	5	4	4	5	22	4.4	4	4	5	4	4	5	4	4	3	4	41	4.1	2
1	2	4	3	1	11	2.2	1	1	2	1	1	2	8	1.33333	5	4	5	5	4	5	28	4.66667	1	2	2	1	1	7	1.4	5	5	5	4	4	23	4.6	5	5	4	5	4	4	5	5	5	4	46	4.6	1
2	2	4	4	2	14	2.8	2	1	1	2	1	2	9	1.5	4	5	4	4	5	4	26	4.33333	2	2	1	2	2	9	1.8	5	4	5	4	4	22	4.4	5	4	4	5	4	5	5	4	5	4	45	4.5	2
2	2	4	3	2	13	2.6	2	2	1	2	2	1	10	1.66667	4	5	5	4	5	4	27	4.5	2	2	1	2	1	8	1.6	4	5	5	4	5	23	4.6	4	4	5	4	5	5	4	5	4	4	44	4.4	2
2	2	4	3	2	13	2.6	2	2	1	2	2	2	11	1.83333	4	5	4	4	5	4	26	4.33333	2	2	1	2	2	9	1.8	5	4	4	5	4	22	4.4	5	5	4	4	5	4	5	5	4	5	46	4.6	2
2	2	4	3	2	13	2.6	2	1	2	2	1	2	10	1.66667	4	5	4	4	5	4	26	4.33333	2	2	1	2	1	8	1.6	4	4	5	4	5	22	4.4	4	4	5	4	5	4	5	4	4	5	44	4.4	2
1	4	3	4	2	14	2.8	4	2	3	4	2	2	17	2.83333	4	4	5	4	5	4	26	4.33333	3	4	3	3	2	15	3	4	4	5	4	4	21	4.2	5	4	4	5	4	4	5	4	4	5	44	4.4	2
1	2	4	2	1	10	2	2	1	1	3	2	2	11	1.83333	4	3	4	5	4	3	23	3.83333	2	1	1	3	2	9	1.8	4	4	3	3	4	18	3.6	5	5	3	4	3	4	4	3	5	4	40	4	2
1	2	3	3	1	10	2	2	1	3	2	2	2	12	2	4	5	5	5	4	4	27	4.5	3	2	2	1	2	10	2	4	4	5	3	4	20	4	4	4	3	4	3	3	4	4	3	5	37	3.7	2
2	1	3	2	3	11	2.2	2	2	3	1	1	1	10	1.66667	4	3	4	5	4	5	25	4.16667	2	2	1	1	2	8	1.6	4	5	5	3	4	21	4.2	5	5	4	4	3	3	5	4	4	5	42	4.2	1
2	2	4	3	1	12	2.4	2	1	2	2	1	2	10	1.66667	4	5	4	5	4	4	26	4.33333	2	2	1	2	1	8	1.6	4	4	5	4	5	22	4.4	4	4	5	4	4	5	5	4	4	5	44	4.4	2
2	2	4	3	2	13	2.6	1	1	2	2	1	2	9	1.5	4	5	4	4	5	4	26	4.33333	2	2	1	2	1	8	1.6	4	5	4	4	5	22	4.4	4	4	5	4	5	4	5	5	4	5	45	4.5	2
2	1	3	2	6	14	2.8	2	2	1	2	1	2	10	1.66667	5	4	5	5	4	4	27	4.5	4	4	5	4	5	22	4.4	5	4	4	5	4	22	4.4	5	5	4	5	4	4	5	4	5	5	46	4.6	2
2	2	4	3	2	13	2.6	2	1	2	2	1	2	10	1.66667	4	5	4	5	4	4	26	4.33333	2	2	1	2	2	9	1.8	4	4	5	4	5	22	4.4	4	4	5	4	5	5	4	5	4	4	44	4.4	2
2	2	4	3	2	13	2.6	2	2	1	2	2	2	11	1.83333	4	5	4	5	4	4	26	4.33333	2	2	1	2	1	8	1.6	4	5	4	5	5	23	4.6	4	5	4	5	5	4	5	4	5	4	45	4.5	2
2	2	4	3	1	12	2.4	2	1	1	2	2	2	10	1.66667	4	5	4	5	4	4	26	4.33333	2	2	1	2	2	9	1.8	4	5	4	5	4	22	4.4	4	5	4	4	5	4	4	5	4	4	43	4.3	2
2	3	3	4	1	13	2.6	4	4	4	5	4	4	25	4.16667	5	4	4	5	4	4	26	4.33333	2	2	1	2	1	8	1.6	5	5	4	5	4	23	4.6	4	5	5	4	4	4	5	5	5	5	46	4.6	1
2	2	4	3	1	12	2.4	1	2	1	1	2	2	9	1.5	5	4	4	5	4	4	26	4.33333	1	2	2	1	2	8	1.6	5	4	5	4	4	22	4.4	5	4	4	5	4	5	4	4	5	5	45	4.5	1
2	2	4	3	1	12	2.4	1	2	1	1	2	2	9	1.5	5	4	4	5	4	4	26	4.33333	1	2	2	1	2	8	1.6	5	4	5	4	4	22	4.4	5	4	4	5	4	5	4	4	5	5	45	4.5	1
1	3	3	5	4	16	3.2	2	1	3	2	3	3	14	2.33333	4	5	5	4	4	5	27	4.5	4	2	2	2	1	11	2.2	4	4	5	4	4	21	4.2	5	4	3	4	3	3	4	5	4	4	39	3.9	1
2	2	3	3	3	13	2.6	1	2	1	1	2	1	8	1.33333	4	5	4	5	5	4	27	4.5	2	1	2	1	1	7	1.4	5	4	5	4	5	23	4.6	5	4	5	5	4	5	4	5	5	4	46	4.6	1
2	2	2	2	2	10	2	3	4	4	2	2	2	17	2.83333	4	3	4	5	4	4	24	4	4	4	3	5	3	19	3.8	4	3	4	3	4	18	3.6	4	5	3	4	4	3	3	3	4	4	37	3.7	2
2	2	2	3	6	15	3	2	1	3	2	2	2	12	2	4	3	4	4	5	4	24	4	1	3	1	4	2	11	2.2	4	5	4	4	5	22	4.4	4	4	4	5	4	4	4	4	5	5	43	4.3	1
1	2	4	2	3	12	2.4	5	5	5	4	4	4	27	4.5	4	4	4	5	4	4	25	4.16667	4	5	4	4	4	21	4.2	4	4	4	5	4	21	4.2	4	4	2	2	2	2	2	3	4	3	28	2.8	2
2	2	4	3	1	12	2.4	2	1	1	2	2	2	10	1.66667	4	5	5	4	5	4	27	4.5	2	2	1	2	1	8	1.6	4	4	5	4	5	22	4.4	5	4	5	4	4	5	5	4	5	4	45	4.5	2
2	2	4	3	1	12	2.4	2	1	2	2	1	2	10	1.66667	4	5	4	5	4	4	26	4.33333	2	1	1	2	2	8	1.6	4	4	5	4	4	21	4.2	5	4	4	5	4	5	5	4	5	5	46	4.6	2
2	2	4	3	1	12	2.4	2	2	1	2	1	2	10	1.66667	4	5	4	5	5	4	27	4.5	2	2	1	2	1	8	1.6	4	5	4	4	5	22	4.4	4	4	5	4	5	4	4	5	4	5	44	4.4	2
1	2	3	2	3	11	2.2	3	2	4	3	4	2	18	3	4	3	3	5	4	4	23	3.83333	3	2	2	1	2	10	2	4	4	5	4	4	21	4.2	4	5	3	3	3	3	3	4	4	4	36	3.6	2
1	1	3	1	5	11	2.2	4	2	3	2	1	2	14	2.33333	4	3	2	4	3	2	18	3	2	2	1	1	2	8	1.6	4	3	4	2	4	17	3.4	3	4	2	3	4	2	4	4	3	4	33	3.3	1
1	2	3	4	2	12	2.4	2	2	3	2	2	3	14	2.33333	4	3	4	5	4	4	24	4	3	2	2	3	2	12	2.4	4	4	5	4	4	21	4.2	5	4	4	5	4	4	5	4	5	4	44	4.4	2
2	2	3	3	6	16	3.2	3	4	5	4	4	2	22	3.66667	4	3	3	4	4	4	22	3.66667	2	4	2	4	2	14	2.8	4	4	5	3	4	20	4	4	5	3	3	4	4	3	5	4	4	39	3.9	3
1	2	4	3	4	14	2.8	2	1	1	2	1	2	9	1.5	5	4	4	5	4	4	26	4.33333	4	5	4	4	5	22	4.4	4	5	5	4	5	23	4.6	5	4	5	4	5	5	4	4	5	4	45	4.5	2
2	2	3	3	2	12	2.4	3	1	2	1	2	1	10	1.66667	4	3	4	5	3	4	23	3.83333	3	2	1	3	2	11	2.2	5	4	5	3	5	22	4.4	4	5	4	5	3	4	5	4	4	5	43	4.3	2
1	2	4	3	2	12	2.4	2	1	2	2	1	1	9	1.5	5	4	4	5	4	4	26	4.33333	5	4	4	3	5	21	4.2	4	5	5	4	5	23	4.6	4	5	5	4	5	4	5	5	4	5	46	4.6	2
2	2	3	3	1	11	2.2	4	3	4	2	1	2	16	2.66667	4	4	5	5	4	5	27	4.5	2	3	2	2	1	10	2	4	5	5	3	4	21	4.2	4	5	4	4	3	4	4	3	4	4	39	3.9	3
2	2	3	3	4	14	2.8	5	4	4	4	2	2	21	3.5	3	2	4	4	2	4	19	3.16667	5	4	4	4	5	22	4.4	4	4	3	4	4	19	3.8	4	5	2	2	2	1	2	2	3	4	27	2.7	2
2	3	4	4	2	15	3	2	1	3	2	2	1	11	1.83333	4	3	4	5	4	5	25	4.16667	2	1	2	2	1	8	1.6	5	4	4	5	5	23	4.6	4	4	3	4	5	4	5	5	5	4	43	4.3	1
2	1	3	1	1	8	1.6	4	3	4	2	4	3	20	3.33333	4	5	4	5	2	4	24	4	5	4	5	4	5	23	4.6	3	4	4	5	4	20	4	2	4	2	4	4	3	5	4	3	2	33	3.3	2
2	2	4	3	2	13	2.6	2	1	2	2	1	2	10	1.66667	4	5	4	4	5	4	26	4.33333	2	2	1	2	2	9	1.8	5	4	5	4	4	22	4.4	5	4	4	5	4	5	4	4	5	4	44	4.4	1
2	2	4	3	2	13	2.6	2	1	2	2	1	2	10	1.66667	4	5	4	5	5	4	27	4.5	2	2	1	2	1	8	1.6	4	4	5	4	4	21	4.2	5	4	5	4	5	5	4	4	5	4	45	4.5	2
2	2	4	3	2	13	2.6	2	1	2	2	1	2	10	1.66667	4	5	4	4	5	4	26	4.33333	2	2	1	2	1	8	1.6	4	4	5	4	4	21	4.2	5	4	5	4	5	4	4	5	4	4	44	4.4	2
2	3	3	4	2	14	2.8	2	1	1	2	1	2	9	1.5	4	5	5	4	5	4	27	4.5	1	2	1	1	2	7	1.4	4	5	5	4	5	23	4.6	5	4	5	5	4	5	5	4	5	4	46	4.6	1
1	3	4	4	2	14	2.8	1	2	1	1	2	1	8	1.33333	5	4	5	5	4	5	28	4.66667	2	1	1	2	1	7	1.4	5	4	5	4	5	23	4.6	5	4	5	5	4	5	4	5	5	4	46	4.6	1
2	4	4	5	2	17	3.4	2	1	2	2	1	1	9	1.5	4	2	5	5	4	4	24	4	1	2	1	1	2	7	1.4	5	4	5	4	4	22	4.4	5	4	5	4	5	4	5	4	5	5	46	4.6	1
2	1	3	2	3	11	2.2	1	2	1	2	1	2	9	1.5	5	2	4	5	4	4	24	4	1	2	1	2	1	7	1.4	4	5	4	5	5	23	4.6	4	4	5	4	5	4	5	4	5	4	44	4.4	1
2	2	4	3	2	13	2.6	2	1	2	1	2	2	10	1.66667	5	1	4	5	4	5	24	4	2	1	2	1	2	8	1.6	5	4	5	4	5	23	4.6	5	4	5	4	5	4	4	5	4	5	45	4.5	1
2	3	3	4	2	14	2.8	1	2	4	4	2	2	15	2.5	5	4	4	5	4	4	26	4.33333	4	4	2	4	4	18	3.6	5	4	5	2	4	20	4	4	5	4	5	4	4	5	5	4	4	44	4.4	1
2	2	3	4	2	13	2.6	3	3	4	2	4	3	19	3.16667	4	3	4	5	4	4	24	4	5	4	4	5	3	21	4.2	5	5	4	4	5	23	4.6	5	5	3	4	3	4	5	4	4	5	42	4.2	2
2	2	3	2	3	12	2.4	4	5	5	4	2	2	22	3.66667	5	4	4	5	4	5	27	4.5	4	5	5	3	5	22	4.4	4	4	5	4	5	22	4.4	5	4	5	4	4	3	5	4	5	5	44	4.4	2
1	2	4	3	1	11	2.2	4	3	4	4	3	4	22	3.66667	3	3	3	4	3	3	19	3.16667	5	5	5	4	4	23	4.6	4	5	5	4	4	22	4.4	4	4	3	3	4	3	3	3	4	4	35	3.5	2
2	2	3	3	3	13	2.6	5	4	5	3	4	4	25	4.16667	5	5	4	5	3	4	26	4.33333	5	4	4	5	4	22	4.4	5	5	4	5	5	24	4.8	4	5	4	4	5	4	5	4	5	4	44	4.4	2
1	2	3	3	1	10	2	2	1	3	2	1	1	10	1.66667	3	2	3	4	3	3	18	3	4	5	4	4	5	22	4.4	4	5	5	4	4	22	4.4	4	5	3	4	5	3	4	3	5	4	40	4	2
2	1	3	2	5	13	2.6	4	4	5	4	5	4	26	4.33333	2	2	1	3	2	4	14	2.33333	4	5	5	4	4	22	4.4	5	5	5	3	5	23	4.6	4	5	2	2	2	4	4	5	5	4	37	3.7	5
2	1	3	1	4	11	2.2	4	4	4	3	3	3	21	3.5	4	4	4	5	4	4	25	4.16667	4	4	5	4	4	21	4.2	5	5	5	4	4	23	4.6	4	5	4	4	5	5	4	4	4	5	44	4.4	1
2	2	4	3	2	13	2.6	2	2	1	2	1	2	10	1.66667	4	5	4	4	5	4	26	4.33333	2	2	1	2	1	8	1.6	4	5	4	5	4	22	4.4	5	4	5	4	5	4	4	5	4	4	44	4.4	2
2	4	3	5	2	16	3.2	2	2	3	3	4	4	18	3	5	5	5	5	5	5	30	5	2	2	1	1	1	7	1.4	4	4	4	4	5	21	4.2	4	4	4	4	4	4	4	5	5	5	43	4.3	1
1	2	3	4	2	12	2.4	4	3	4	5	3	4	23	3.83333	3	5	4	5	3	4	24	4	4	5	4	5	5	23	4.6	3	4	5	5	4	21	4.2	4	3	2	2	3	2	2	1	4	4	27	2.7	2
1	1	3	2	6	13	2.6	2	1	3	3	4	2	15	2.5	5	4	5	4	4	5	27	4.5	4	4	3	5	3	19	3.8	4	5	5	5	4	23	4.6	5	5	5	5	5	5	4	4	3	4	45	4.5	2
2	2	3	2	1	10	2	2	1	2	1	2	2	10	1.66667	5	4	5	4	5	4	27	4.5	2	1	2	1	2	8	1.6	5	4	5	4	4	22	4.4	5	4	5	4	5	4	5	3	4	5	44	4.4	2
2	2	4	3	3	14	2.8	2	1	2	2	1	1	9	1.5	5	2	5	5	4	5	26	4.33333	1	2	1	1	2	7	1.4	5	4	5	4	5	23	4.6	5	4	5	4	4	5	4	5	4	4	44	4.4	1
2	1	3	2	3	11	2.2	2	1	2	1	2	1	9	1.5	5	2	5	4	4	5	25	4.16667	2	1	2	2	1	8	1.6	5	4	4	5	4	22	4.4	5	5	4	5	4	5	5	4	4	5	46	4.6	1
1	4	3	5	2	15	3	4	3	4	3	2	2	18	3	4	2	4	4	4	4	22	3.66667	4	2	2	4	2	14	2.8	4	4	4	4	4	20	4	4	4	3	4	2	3	3	4	3	4	34	3.4	1
1	1	3	2	6	13	2.6	2	1	2	1	1	1	8	1.33333	5	2	5	4	5	5	26	4.33333	2	1	2	2	1	8	1.6	5	4	4	5	4	22	4.4	5	5	4	5	4	5	4	4	5	4	45	4.5	1
1	4	4	5	1	15	3	2	1	2	1	1	1	8	1.33333	5	2	4	5	4	4	24	4	1	2	1	1	2	7	1.4	5	4	5	4	5	23	4.6	5	4	5	4	5	5	4	5	4	5	46	4.6	1
1	2	3	4	2	12	2.4	3	2	3	2	3	3	16	2.66667	4	5	4	5	4	4	26	4.33333	2	2	1	2	1	8	1.6	4	4	5	5	4	22	4.4	4	5	4	4	3	4	4	5	3	5	41	4.1	2
2	2	4	3	2	13	2.6	2	1	2	2	1	2	10	1.66667	4	5	4	4	4	5	26	4.33333	2	1	2	2	1	8	1.6	4	5	4	5	5	23	4.6	4	5	5	4	5	4	4	5	4	4	44	4.4	2
1	3	2	4	2	12	2.4	1	2	1	2	1	2	9	1.5	5	2	4	5	4	2	22	3.66667	1	1	2	1	1	6	1.2	4	5	4	3	4	20	4	5	4	5	4	5	4	5	4	5	4	45	4.5	1
2	3	3	4	2	14	2.8	3	2	3	2	3	3	16	2.66667	3	2	3	4	3	3	18	3	3	2	2	1	2	10	2	4	5	4	4	5	22	4.4	4	5	4	4	4	5	4	4	5	4	43	4.3	1
1	1	3	1	3	9	1.8	2	2	1	2	2	2	11	1.83333	4	5	4	4	4	5	26	4.33333	4	5	4	4	5	22	4.4	4	5	5	5	5	24	4.8	4	4	3	4	4	4	5	4	4	5	41	4.1	2
2	2	2	2	4	12	2.4	2	1	2	4	4	4	17	2.83333	4	3	3	5	3	4	22	3.66667	3	4	5	4	3	19	3.8	5	5	4	3	4	21	4.2	4	4	2	3	2	3	4	3	4	4	33	3.3	2
2	4	3	5	4	18	3.6	4	4	5	3	4	3	23	3.83333	4	3	3	4	3	2	19	3.16667	3	2	2	3	1	11	2.2	3	3	4	3	5	18	3.6	3	4	2	1	2	1	3	2	3	2	23	2.3	2
2	2	2	2	3	11	2.2	2	3	4	2	2	2	15	2.5	4	3	2	5	2	5	21	3.5	2	2	3	2	2	11	2.2	4	4	3	1	5	17	3.4	5	4	2	2	3	3	4	5	4	4	36	3.6	2
1	2	3	2	1	9	1.8	2	1	2	1	2	2	10	1.66667	4	2	4	5	4	4	23	3.83333	2	1	2	1	2	8	1.6	5	4	5	4	5	23	4.6	5	4	4	5	4	5	5	4	4	5	45	4.5	1
1	4	2	5	6	18	3.6	5	4	5	2	4	3	23	3.83333	5	4	5	5	4	5	28	4.66667	5	4	5	3	4	21	4.2	5	4	5	3	4	21	4.2	5	4	5	3	3	4	5	3	4	5	41	4.1	2
1	2	3	3	6	15	3	3	2	4	4	2	2	17	2.83333	3	4	4	4	3	3	21	3.5	3	4	5	2	2	16	3.2	2	4	4	3	5	18	3.6	4	4	2	2	3	2	4	3	2	4	30	3	3
2	2	4	2	1	11	2.2	3	2	2	2	2	3	14	2.33333	3	4	4	5	4	4	24	4	2	2	2	1	1	8	1.6	3	3	4	3	5	18	3.6	3	3	3	3	3	3	3	4	3	4	32	3.2	2
2	2	4	3	2	13	2.6	2	2	3	2	2	1	12	2	5	3	4	4	4	5	25	4.16667	2	2	1	1	1	7	1.4	4	4	5	4	5	22	4.4	5	5	4	4	5	4	5	5	4	4	45	4.5	1
2	4	2	5	2	15	3	5	4	5	4	4	4	26	4.33333	3	4	4	5	4	5	25	4.16667	5	4	5	4	4	22	4.4	3	3	4	4	5	19	3.8	3	4	3	4	4	5	4	4	3	4	38	3.8	3
2	1	3	2	3	11	2.2	2	1	2	2	1	2	10	1.66667	4	3	4	4	5	4	24	4	2	1	2	1	1	7	1.4	4	5	5	4	5	23	4.6	4	4	5	4	4	5	4	5	4	5	44	4.4	2
2	1	3	2	3	11	2.2	5	2	4	3	2	3	19	3.16667	4	5	4	2	4	5	24	4	4	5	4	4	4	21	4.2	4	5	4	4	5	22	4.4	4	4	2	3	2	3	4	3	4	4	33	3.3	2
2	1	3	2	3	11	2.2	3	4	3	2	3	2	17	2.83333	4	3	4	5	3	4	23	3.83333	4	5	4	5	3	21	4.2	4	5	4	5	3	21	4.2	4	5	4	5	4	3	4	3	4	5	41	4.1	2
2	2	2	3	6	15	3	2	1	2	2	1	1	9	1.5	4	3	4	5	4	5	25	4.16667	2	1	3	2	1	9	1.8	4	5	4	5	3	21	4.2	4	5	4	5	4	5	4	2	5	4	42	4.2	1
1	2	2	2	3	10	2	4	5	5	4	5	4	27	4.5	5	5	4	5	3	5	27	4.5	4	5	5	4	5	23	4.6	4	4	5	5	4	22	4.4	5	4	4	5	3	4	4	5	3	4	41	4.1	5
2	1	3	2	6	14	2.8	2	2	2	3	2	2	13	2.16667	4	3	4	4	4	5	24	4	2	2	3	2	2	11	2.2	4	5	4	3	4	20	4	4	5	4	4	4	5	4	4	4	5	43	4.3	1
2	3	2	4	6	17	3.4	3	4	4	3	4	3	21	3.5	4	4	5	4	3	5	25	4.16667	5	4	2	4	2	17	3.4	3	3	4	3	3	16	3.2	2	4	2	4	2	3	4	2	4	4	31	3.1	2
1	3	3	5	1	13	2.6	2	2	4	2	3	2	15	2.5	4	4	4	4	4	4	24	4	2	2	2	3	2	11	2.2	4	4	4	3	4	19	3.8	4	4	3	3	3	3	3	3	2	4	32	3.2	2
2	2	2	4	2	12	2.4	1	2	2	1	2	1	9	1.5	5	4	5	5	4	5	28	4.66667	2	1	1	2	1	7	1.4	5	5	4	5	4	23	4.6	5	4	4	5	4	5	4	5	5	4	45	4.5	1
2	2	4	3	3	14	2.8	1	2	1	1	2	1	8	1.33333	5	2	5	4	4	5	25	4.16667	1	1	2	1	2	7	1.4	5	4	5	4	4	22	4.4	5	4	5	5	4	5	4	4	5	4	45	4.5	1
2	2	3	3	3	13	2.6	3	2	4	3	4	2	18	3	2	3	1	4	2	3	15	2.5	4	5	3	2	2	16	3.2	3	4	2	2	3	14	2.8	2	3	4	3	3	3	2	2	3	3	28	2.8	2
2	2	2	2	6	14	2.8	2	1	3	2	2	2	12	2	4	3	3	5	5	3	23	3.83333	1	2	2	1	1	7	1.4	5	5	4	5	4	23	4.6	4	5	5	5	4	4	5	4	5	5	46	4.6	1
2	2	3	3	2	12	2.4	4	4	5	4	3	4	24	4	5	5	4	5	4	4	27	4.5	4	5	5	3	4	21	4.2	5	4	4	3	5	21	4.2	5	4	4	5	4	5	5	4	3	5	44	4.4	1
2	2	4	3	4	15	3	1	1	2	1	2	1	8	1.33333	5	1	4	5	4	5	24	4	1	2	1	1	2	7	1.4	5	4	5	4	4	22	4.4	5	4	5	4	5	5	4	5	4	5	46	4.6	1
1	1	3	2	1	8	1.6	2	1	1	3	2	2	11	1.83333	5	4	5	5	4	5	28	4.66667	3	1	1	1	1	7	1.4	1	4	5	5	4	19	3.8	5	5	4	5	5	5	4	3	5	5	46	4.6	1
2	2	4	3	1	12	2.4	1	2	1	2	1	1	8	1.33333	5	2	5	4	4	5	25	4.16667	2	1	2	2	1	8	1.6	5	4	5	5	4	23	4.6	5	4	5	4	4	5	4	5	4	4	44	4.4	1
1	3	3	4	2	13	2.6	5	4	5	4	5	5	28	4.66667	4	5	4	5	5	4	27	4.5	2	1	2	2	1	8	1.6	4	5	4	5	5	23	4.6	4	4	5	5	4	4	5	4	4	5	44	4.4	1
1	4	2	5	1	13	2.6	3	2	5	3	2	4	19	3.16667	5	4	4	5	4	4	26	4.33333	3	2	2	1	1	9	1.8	4	4	5	4	4	21	4.2	5	4	3	4	3	3	3	4	4	5	38	3.8	1
2	2	4	3	2	13	2.6	1	2	2	3	1	1	10	1.66667	3	3	2	5	4	3	20	3.33333	4	2	3	2	3	14	2.8	5	5	4	3	4	21	4.2	3	5	4	5	4	5	3	4	4	5	42	4.2	1
2	2	4	3	2	13	2.6	2	1	2	1	2	2	10	1.66667	5	4	5	4	5	4	27	4.5	4	5	4	5	4	22	4.4	5	4	5	4	5	23	4.6	4	5	4	5	4	5	5	4	5	4	45	4.5	1
1	5	2	5	3	16	3.2	2	1	2	2	1	2	10	1.66667	4	4	5	4	5	4	26	4.33333	2	1	2	1	1	7	1.4	4	5	4	4	5	22	4.4	4	5	5	5	4	4	5	4	5	4	45	4.5	1
1	2	2	4	6	15	3	4	4	5	5	3	3	24	4	2	3	4	4	2	5	20	3.33333	3	2	2	2	1	10	2	4	4	5	5	4	22	4.4	4	5	3	3	4	4	4	4	5	5	41	4.1	2
2	1	3	2	1	9	1.8	2	1	2	1	1	1	8	1.33333	5	2	5	4	4	5	25	4.16667	2	1	2	1	1	7	1.4	5	4	5	5	4	23	4.6	5	4	5	5	4	5	4	5	5	4	46	4.6	1
2	2	3	2	6	15	3	1	2	2	1	2	1	9	1.5	5	2	5	4	4	5	25	4.16667	2	1	2	2	1	8	1.6	5	4	5	5	4	23	4.6	5	4	4	5	4	5	4	4	5	4	44	4.4	2
2	4	3	5	6	20	4	5	5	4	4	5	4	27	4.5	4	5	4	5	4	5	27	4.5	2	1	2	1	1	7	1.4	4	5	4	3	5	21	4.2	5	5	3	4	5	4	5	5	4	4	44	4.4	1
1	1	3	2	5	12	2.4	2	1	2	1	2	1	9	1.5	5	2	5	4	5	5	26	4.33333	2	1	2	1	1	7	1.4	5	4	5	5	4	23	4.6	5	4	5	4	5	5	4	5	4	4	45	4.5	2
2	4	2	5	2	15	3	1	2	1	1	2	2	9	1.5	4	3	5	4	5	4	25	4.16667	2	1	1	2	2	8	1.6	4	5	4	4	5	22	4.4	5	4	4	5	5	4	4	5	4	5	45	4.5	2
1	1	3	4	1	10	2	4	5	3	4	2	3	21	3.5	4	5	4	5	5	4	27	4.5	3	4	3	2	3	15	3	4	4	5	4	5	22	4.4	4	4	3	4	3	4	4	3	4	5	38	3.8	2
2	1	3	1	3	10	2	1	2	4	4	5	4	20	3.33333	4	1	4	5	4	4	22	3.66667	4	5	4	5	5	23	4.6	3	4	4	2	4	17	3.4	4	5	2	3	4	3	4	5	3	4	37	3.7	1
1	1	3	2	2	9	1.8	1	2	1	1	2	1	8	1.33333	5	2	5	5	4	5	26	4.33333	1	2	1	1	2	7	1.4	5	5	4	5	4	23	4.6	5	4	5	4	4	5	4	5	5	4	45	4.5	2
2	3	3	5	2	15	3	3	2	3	2	2	3	15	2.5	4	2	4	4	3	5	22	3.66667	3	3	4	3	4	17	3.4	4	5	5	4	5	23	4.6	4	4	3	3	4	3	4	4	5	5	39	3.9	2
1	4	1	5	4	15	3	2	2	3	3	4	3	17	2.83333	4	5	4	4	5	4	26	4.33333	4	3	2	3	2	14	2.8	4	5	4	4	3	20	4	4	5	3	4	4	5	4	3	5	4	41	4.1	1
1	4	3	4	1	13	2.6	2	1	2	2	1	2	10	1.66667	4	2	5	4	5	4	24	4	1	2	1	1	2	7	1.4	4	5	4	4	5	22	4.4	5	4	5	4	4	5	4	5	4	5	45	4.5	2
2	2	4	2	1	11	2.2	2	3	4	2	1	2	14	2.33333	3	5	4	5	3	4	24	4	4	3	5	4	3	19	3.8	4	4	5	2	5	20	4	4	5	3	3	4	3	5	4	3	5	39	3.9	2
1	2	4	3	1	11	2.2	2	3	2	3	2	2	14	2.33333	4	4	4	5	3	4	24	4	5	4	4	4	4	21	4.2	5	4	5	3	5	22	4.4	5	5	4	4	3	3	4	4	3	4	39	3.9	2
2	2	3	3	1	11	2.2	3	2	3	4	3	4	19	3.16667	3	1	1	4	2	1	12	2	4	5	3	2	3	17	3.4	5	5	5	3	4	22	4.4	4	5	2	2	3	3	4	4	4	3	34	3.4	2
2	2	3	2	3	12	2.4	4	3	4	3	5	3	22	3.66667	2	1	1	2	1	2	9	1.5	4	3	5	2	3	17	3.4	3	4	2	2	3	14	2.8	4	4	2	1	2	3	2	2	3	2	25	2.5	3
2	3	3	4	2	14	2.8	1	1	2	2	1	1	8	1.33333	4	3	4	5	4	4	24	4	1	1	2	1	1	6	1.2	4	5	4	4	3	20	4	4	5	3	4	4	5	4	4	4	5	42	4.2	1
2	1	3	1	5	12	2.4	4	2	4	5	1	1	17	2.83333	1	1	1	2	2	3	10	1.66667	4	4	5	3	2	18	3.6	5	5	4	2	5	21	4.2	5	5	1	2	1	2	5	5	5	5	36	3.6	4
1	2	3	2	1	9	1.8	2	1	2	1	2	1	9	1.5	4	3	3	4	5	3	22	3.66667	2	1	1	2	2	8	1.6	4	4	5	4	4	21	4.2	5	4	4	5	4	4	4	5	4	4	43	4.3	2
2	2	3	2	3	12	2.4	2	3	2	2	2	4	15	2.5	4	4	2	4	2	4	20	3.33333	4	4	5	4	3	20	4	4	4	4	3	4	19	3.8	5	4	4	4	5	4	4	5	4	2	41	4.1	2
2	1	3	2	3	11	2.2	5	5	5	5	4	5	29	4.83333	3	3	3	5	4	4	22	3.66667	4	5	5	5	4	23	4.6	4	4	4	3	4	19	3.8	4	4	3	3	3	3	4	4	4	4	36	3.6	1
1	3	4	3	2	13	2.6	2	2	4	3	3	2	16	2.66667	4	4	4	4	5	4	25	4.16667	2	2	1	1	1	7	1.4	4	4	4	5	4	21	4.2	4	4	4	4	4	4	5	5	4	5	43	4.3	2
2	2	4	3	2	13	2.6	2	1	3	2	2	2	12	2	4	2	4	5	4	5	24	4	2	3	2	2	1	10	2	4	5	4	2	4	19	3.8	4	5	2	3	3	2	4	5	4	5	37	3.7	1
2	1	3	1	2	9	1.8	5	4	5	3	4	4	25	4.16667	4	5	4	5	4	5	27	4.5	4	5	5	5	5	24	4.8	4	3	4	4	5	20	4	3	3	4	3	2	3	4	4	3	4	33	3.3	5
2	3	2	4	3	14	2.8	4	4	4	4	4	4	24	4	4	3	4	4	3	4	22	3.66667	3	4	3	2	2	14	2.8	3	4	4	3	4	18	3.6	4	4	4	4	4	3	4	4	3	4	38	3.8	2
2	2	3	3	6	16	3.2	2	2	3	2	1	2	12	2	4	4	5	4	4	5	26	4.33333	3	3	4	4	3	17	3.4	5	4	4	5	5	23	4.6	4	4	4	5	4	4	4	3	4	5	41	4.1	2
2	1	1	2	6	12	2.4	5	3	4	5	2	5	24	4	4	3	5	4	3	5	24	4	5	3	4	5	2	19	3.8	3	5	4	3	5	20	4	4	3	5	4	3	5	2	3	4	5	38	3.8	2
1	3	4	3	2	13	2.6	2	1	4	2	2	2	13	2.16667	4	4	5	4	4	5	26	4.33333	2	2	1	2	1	8	1.6	5	4	5	5	4	23	4.6	5	4	5	4	4	5	4	4	5	5	45	4.5	2
1	4	3	5	1	14	2.8	2	2	4	4	2	1	15	2.5	5	1	5	5	5	5	26	4.33333	1	2	2	1	1	7	1.4	4	5	4	4	5	22	4.4	5	4	4	4	5	5	4	4	5	5	45	4.5	1
1	2	3	2	6	14	2.8	2	1	1	2	1	1	8	1.33333	4	5	4	4	5	4	26	4.33333	1	2	2	1	2	8	1.6	5	4	4	5	4	22	4.4	5	5	4	4	5	4	4	5	4	5	45	4.5	1
2	1	4	1	3	11	2.2	4	5	5	2	3	3	22	3.66667	5	4	5	4	5	4	27	4.5	4	5	5	4	4	22	4.4	3	4	5	3	5	20	4	4	5	3	3	4	5	4	5	3	4	40	4	1
1	1	3	2	5	12	2.4	4	5	4	2	5	2	22	3.66667	5	5	4	5	5	4	28	4.66667	4	5	4	4	5	22	4.4	5	4	5	2	4	20	4	5	5	4	5	4	4	5	4	4	5	45	4.5	1
1	2	3	2	1	9	1.8	2	2	1	2	1	2	10	1.66667	5	4	5	4	5	4	27	4.5	2	1	2	1	1	7	1.4	4	4	5	4	5	22	4.4	4	4	5	4	5	4	4	5	4	5	44	4.4	1
2	2	3	3	3	13	2.6	2	2	4	3	2	2	15	2.5	4	4	5	5	4	5	27	4.5	4	4	2	3	2	15	3	4	5	4	4	4	21	4.2	4	5	3	4	3	4	3	4	5	4	39	3.9	1
2	1	4	1	1	9	1.8	3	3	4	2	3	2	17	2.83333	4	3	3	4	4	5	23	3.83333	2	3	4	3	2	14	2.8	4	4	4	3	4	19	3.8	4	5	3	3	3	3	4	4	4	4	37	3.7	1
1	2	3	3	2	11	2.2	2	3	3	4	2	2	16	2.66667	4	3	4	5	4	5	25	4.16667	1	2	2	1	1	7	1.4	4	5	4	3	5	21	4.2	4	4	3	4	4	5	4	4	5	3	40	4	2
1	2	4	3	2	12	2.4	2	1	5	2	1	1	12	2	4	2	1	5	2	1	15	2.5	1	2	5	1	2	11	2.2	5	4	5	2	5	21	4.2	4	5	5	4	5	4	5	4	5	5	46	4.6	1
2	1	3	1	3	10	2	4	4	4	4	3	4	23	3.83333	5	2	3	5	4	3	22	3.66667	5	4	5	4	3	21	4.2	4	5	5	3	4	21	4.2	5	4	3	4	4	4	5	4	3	4	40	4	2
1	3	3	4	2	13	2.6	1	3	2	1	2	1	10	1.66667	4	2	5	4	5	3	23	3.83333	2	1	2	3	2	10	2	4	5	3	1	4	17	3.4	5	4	5	4	3	5	4	4	5	4	43	4.3	2
2	1	3	2	1	9	1.8	4	5	5	4	3	3	24	4	5	5	4	5	4	5	28	4.66667	4	5	4	5	5	23	4.6	4	4	5	3	4	20	4	4	5	4	4	4	5	4	5	4	4	43	4.3	3
1	2	3	3	1	10	2	2	1	2	1	2	1	9	1.5	5	4	5	4	5	4	27	4.5	2	1	2	1	1	7	1.4	4	5	4	5	4	22	4.4	4	5	4	5	4	5	4	5	4	5	45	4.5	2
2	3	3	4	2	14	2.8	5	4	4	4	5	4	26	4.33333	5	5	4	4	5	5	28	4.66667	5	5	4	5	4	23	4.6	5	5	4	4	5	23	4.6	4	5	4	5	4	5	5	4	5	4	45	4.5	2
2	2	3	3	3	13	2.6	5	3	5	4	1	3	21	3.5	4	3	2	1	4	3	17	2.83333	3	1	4	1	2	11	2.2	3	4	3	2	3	15	3	4	4	1	2	3	2	4	5	4	4	33	3.3	1
2	1	3	1	3	10	2	5	4	4	5	3	3	24	4	4	3	4	4	4	5	24	4	4	4	5	4	4	21	4.2	4	4	3	3	4	18	3.6	4	5	3	3	3	3	4	4	3	4	36	3.6	3
1	2	3	4	3	13	2.6	4	5	4	2	4	4	23	3.83333	3	2	3	4	3	4	19	3.16667	4	5	3	4	4	20	4	5	5	4	4	3	21	4.2	4	4	3	4	2	2	3	4	2	4	32	3.2	3
1	3	3	5	2	14	2.8	3	4	4	5	4	3	23	3.83333	4	5	4	5	4	4	26	4.33333	5	5	4	4	4	22	4.4	5	5	5	4	5	24	4.8	5	5	4	4	4	5	5	4	5	5	46	4.6	2
2	2	3	2	5	14	2.8	4	3	5	4	3	4	23	3.83333	3	3	4	3	2	4	19	3.16667	4	3	5	4	3	19	3.8	5	4	5	5	4	23	4.6	5	5	4	3	5	4	5	5	4	3	43	4.3	1
1	2	3	3	1	10	2	4	4	3	2	4	2	19	3.16667	4	3	4	4	2	2	19	3.16667	4	4	4	5	3	20	4	4	5	4	3	4	20	4	2	3	2	4	2	3	4	3	2	4	29	2.9	2
1	3	4	4	2	14	2.8	2	1	4	2	2	2	13	2.16667	4	3	4	5	4	4	24	4	3	5	3	4	3	18	3.6	4	4	5	5	4	22	4.4	3	4	4	5	4	3	4	4	5	4	40	4	2
1	2	3	2	3	11	2.2	2	2	1	3	2	2	12	2	4	3	4	5	4	4	24	4	2	2	1	2	1	8	1.6	4	5	4	4	4	21	4.2	5	5	3	2	4	4	4	5	4	5	41	4.1	1
1	2	4	3	2	12	2.4	3	2	3	1	2	3	14	2.33333	5	3	2	4	5	3	22	3.66667	2	1	1	2	1	7	1.4	4	5	4	3	5	21	4.2	4	5	3	4	3	5	4	5	3	4	40	4	2
1	2	3	4	2	12	2.4	3	2	4	4	2	2	17	2.83333	4	3	4	4	4	5	24	4	3	3	4	3	3	16	3.2	4	4	4	5	5	22	4.4	4	4	4	5	3	4	4	4	5	4	41	4.1	2
1	1	3	2	3	10	2	1	2	1	3	2	2	11	1.83333	4	3	4	5	4	3	23	3.83333	2	3	3	2	2	12	2.4	4	5	4	4	3	20	4	4	5	4	4	3	4	5	4	4	5	42	4.2	1
2	2	3	3	2	12	2.4	2	4	4	3	2	4	19	3.16667	4	5	4	5	4	5	27	4.5	3	4	2	2	2	13	2.6	4	4	5	4	5	22	4.4	4	4	4	4	5	4	5	5	4	4	43	4.3	1
1	2	3	2	1	9	1.8	2	1	2	2	2	2	11	1.83333	4	2	4	4	5	4	23	3.83333	2	2	1	1	2	8	1.6	4	5	4	4	4	21	4.2	5	5	4	5	4	4	5	5	4	5	46	4.6	1
2	2	3	2	3	12	2.4	3	2	4	2	5	3	19	3.16667	2	5	4	5	4	5	25	4.16667	3	4	2	1	2	12	2.4	5	4	5	3	5	22	4.4	4	5	4	5	4	3	4	5	2	5	41	4.1	2
1	2	3	4	2	12	2.4	2	1	4	3	2	2	14	2.33333	4	4	4	5	3	5	25	4.16667	3	3	3	2	1	12	2.4	5	4	4	4	5	22	4.4	5	5	3	4	3	3	4	4	4	5	40	4	1
2	3	3	3	2	13	2.6	2	2	4	2	2	2	14	2.33333	4	3	3	4	4	3	21	3.5	4	4	3	2	2	15	3	4	5	4	4	5	22	4.4	4	5	4	4	5	5	4	5	4	5	45	4.5	1
2	2	3	2	3	12	2.4	2	2	3	2	4	3	16	2.66667	4	5	4	4	3	2	22	3.66667	4	3	2	2	1	12	2.4	4	4	4	2	4	18	3.6	3	4	3	4	2	3	4	4	4	4	35	3.5	2
1	3	3	4	4	15	3	2	2	2	1	2	2	11	1.83333	4	4	4	5	4	4	25	4.16667	2	2	1	1	2	8	1.6	4	5	4	5	4	22	4.4	4	5	5	5	4	4	5	4	4	5	45	4.5	2
2	2	3	2	1	10	2	2	2	4	3	2	3	16	2.66667	4	4	3	4	3	2	20	3.33333	4	4	5	4	4	21	4.2	5	4	4	5	5	23	4.6	4	4	3	3	4	4	5	3	4	5	39	3.9	2
1	2	4	2	2	11	2.2	3	3	4	4	3	4	21	3.5	3	3	4	4	3	5	22	3.66667	3	4	2	3	2	14	2.8	4	4	4	3	4	19	3.8	4	4	3	3	3	3	4	3	3	3	33	3.3	2
1	1	4	2	4	12	2.4	4	2	4	4	2	4	20	3.33333	5	4	4	4	5	4	26	4.33333	3	2	4	3	2	14	2.8	4	4	5	3	4	20	4	4	5	4	4	2	2	4	3	4	4	36	3.6	1
2	1	3	2	2	10	2	3	4	5	3	2	3	20	3.33333	4	3	4	5	4	3	23	3.83333	3	5	4	3	2	17	3.4	4	4	5	3	4	20	4	4	5	3	4	3	4	5	4	3	3	38	3.8	2
2	2	4	2	1	11	2.2	4	3	4	4	4	4	23	3.83333	2	3	2	4	3	3	17	2.83333	4	5	3	3	2	17	3.4	5	5	4	4	5	23	4.6	4	5	3	4	4	4	5	4	4	5	42	4.2	1
2	1	3	2	3	11	2.2	4	3	5	4	2	2	20	3.33333	4	5	4	5	4	2	24	4	4	5	5	4	5	23	4.6	4	5	5	4	5	23	4.6	4	4	3	4	5	3	4	5	4	5	41	4.1	1
2	2	2	3	3	12	2.4	3	3	5	4	2	2	19	3.16667	4	1	3	5	5	3	21	3.5	2	3	1	1	2	9	1.8	5	4	3	3	5	20	4	3	5	3	4	2	3	2	1	3	4	30	3	2
2	2	3	3	2	12	2.4	4	5	5	1	1	1	17	2.83333	5	5	4	5	5	4	28	4.66667	5	4	4	5	5	23	4.6	4	4	5	4	5	22	4.4	5	4	5	4	5	5	4	4	5	4	45	4.5	1
2	2	4	3	1	12	2.4	4	3	4	3	2	4	20	3.33333	4	3	4	4	4	5	24	4	2	2	2	1	1	8	1.6	4	4	5	4	4	21	4.2	4	5	4	4	5	4	4	5	4	4	43	4.3	2
1	3	3	5	1	13	2.6	2	2	3	2	2	2	13	2.16667	5	3	4	4	4	5	25	4.16667	2	3	2	1	2	10	2	5	4	4	4	4	21	4.2	5	5	4	5	3	4	4	4	5	5	44	4.4	1
1	1	3	2	1	8	1.6	2	1	2	2	1	1	9	1.5	4	2	3	4	4	3	20	3.33333	4	3	4	4	3	18	3.6	5	4	4	3	4	20	4	5	5	4	5	4	5	5	3	4	5	45	4.5	2
2	2	4	2	1	11	2.2	2	2	2	1	2	2	11	1.83333	4	4	4	4	4	4	24	4	2	1	2	1	1	7	1.4	3	4	3	3	5	18	3.6	4	4	3	3	4	3	4	5	4	4	38	3.8	3
2	3	3	4	2	14	2.8	4	2	4	2	1	2	15	2.5	4	3	2	4	5	2	20	3.33333	4	5	4	5	4	22	4.4	5	4	5	4	4	22	4.4	5	4	5	4	5	4	5	4	3	4	43	4.3	2
																					做中心化处理的均值23.928125							做中心化处理的均值12.803125							做中心化处理的均值20.90625												做中心化处理的均值40.678125
[truncated: 5 more columns]
